# Supplementary material
Source: PubMed Central journal article supplement (PMC7660588)
Supplement: NIHMS1617157-supplement-Supplemental_Material.pdf [file NIHMS1617157-supplement-Supplemental_Material.pdf]

# Impact of Medicare’s Bundled Payments Initiative on Patient Selection, Payments, and Outcomes for PCI and CABG

Christian McNeely, MD<sup>1</sup> E. John Orav, PhD<sup>2,3</sup> Jie Zheng, PhD<sup>3</sup> and Karen E. Joynt Maddox, MD, MPH<sup>1,4</sup>

1. Cardiovascular Division, Department of Medicine, Washington University School of Medicine
2. Department of Medicine, Division of General Internal Medicine, Brigham and Women’s Hospital
3. Department of Health Policy and Management, Harvard School of Public Health
4. Center for Health Economics and Policy, Institute for Public Health at Washington University

## Supplemental Material

|                                                                                                              |   |
|--------------------------------------------------------------------------------------------------------------|---|
| Supplemental Table 1: Enrollment and Follow-Up .....                                                         | 2 |
| Supplemental Table 2. Comparison of pre-trends for Medicare payments for BPCI versus Control Hospitals.....  | 3 |
| Supplemental Table 3. Comparison of pre-trends for Clinical Outcomes for BPCI versus Control Hospitals ..... | 4 |
| Supplemental Table 4. Outlier vs. non-outlier cases .....                                                    | 5 |

**Supplemental Table 1: Enrollment and Follow-Up**

|                 | <b>Start Date</b>         | <b>N PCI hospitals</b> | <b>N CABG hospitals</b> |
|-----------------|---------------------------|------------------------|-------------------------|
| <b>All</b>      | 1/1/2014                  | 26                     | 48                      |
|                 | 10/1/2014                 | 0                      | 5                       |
|                 | 1/1/2015                  | 1                      | 4                       |
|                 | 4/1/2015                  | 28                     | 16                      |
|                 | 7/1/2015                  | 43                     | 46                      |
|                 | 10/1/2015                 | 51                     | 23                      |
|                 | Mean follow-up in sample: | 14.7                   | 18.4                    |
| <b>BPCI</b>     | 1/1/2014                  | 8                      | 16                      |
|                 | 10/1/2014                 | 0                      | 2                       |
|                 | 1/1/2015                  | 1                      | 2                       |
|                 | 4/1/2015                  | 13                     | 6                       |
|                 | 7/1/2015                  | 15                     | 16                      |
|                 | 10/1/2015                 | 16                     | 10                      |
|                 | Mean follow-up in sample: | 14.7                   | 17.9                    |
| <b>Non-BPCI</b> | 1/1/2014                  | 18                     | 32                      |
|                 | 10/1/2014                 | 0                      | 3                       |
|                 | 1/1/2015                  | 0                      | 2                       |
|                 | 4/1/2015                  | 15                     | 10                      |
|                 | 7/1/2015                  | 28                     | 30                      |
|                 | 10/1/2015                 | 35                     | 13                      |
|                 | Mean follow-up in sample: | 14.8                   | 18.7                    |

**Supplemental Table 2. Comparison of pre-trends for Medicare payments for BPCI versus Control Hospitals**

|             |                       | BPCI   |       | CONTROL |       | Difference |         |
|-------------|-----------------------|--------|-------|---------|-------|------------|---------|
|             |                       | Beta   | P     | Beta    | P     | Beta       | P value |
| <b>PCI</b>  | Total payment         | -\$558 | 0.001 | -\$207  | 0.432 | -\$351     | 0.257   |
|             | Index hospitalization | \$9    | 0.685 | \$7     | 0.836 | \$2        | 0.970   |
|             | Readmission           | -\$207 | 0.023 | \$19    | 0.891 | -\$226     | 0.175   |
|             | SNF                   | -\$207 | 0.001 | -\$163  | 0.068 | -\$44      | 0.684   |
|             | IRF                   | \$14   | 0.703 | \$17    | 0.734 | -\$3       | 0.958   |
|             | HHA                   | -\$91  | 0.000 | -\$86   | 0.007 | -\$5       | 0.892   |
|             | DME                   | -\$10  | 0.871 | -\$262  | 0.193 | \$252      | 0.232   |
| <b>CABG</b> | Total payment         | -\$5   | 0.985 | \$551   | 0.192 | -\$556     | 0.262   |
|             | Index hospitalization | \$11   | 0.922 | \$144   | 0.481 | -\$133     | 0.569   |
|             | Readmission           | \$295  | 0.037 | \$651   | 0.009 | -\$357     | 0.213   |
|             | SNF                   | -\$159 | 0.009 | -\$94   | 0.367 | -\$65      | 0.594   |
|             | IRF                   | -\$2   | 0.967 | \$145   | 0.080 | -\$146     | 0.109   |
|             | HHA                   | -\$92  | 0.000 | -\$124  | 0.000 | \$32       | 0.385   |
|             | DME                   | -\$63  | 0.018 | -\$87   | 0.051 | \$24       | 0.636   |

CABG – Coronary Artery Bypass Grafting; DME – Durable medical equipment; HHA – home health agency; IRF – Inpatient rehabilitation facility; PCI – Percutaneous coronary intervention; SNF – Skilled nursing facility

**Supplemental Table 3. Comparison of pre-trends for Clinical Outcomes for BPCI versus Control Hospitals**

|             |                 | BPCI   |       | CONTROL |       | Difference |         |
|-------------|-----------------|--------|-------|---------|-------|------------|---------|
|             |                 | Beta   | P     | Beta    | P     | Beta       | P value |
| <b>PCI</b>  | Length of stay  | -2.8%  | 0.406 | -6.1%   | 0.063 | 3.3%       | 0.476   |
|             | 30d ED          | -1.1%  | 0.134 | -0.4%   | 0.670 | -0.7%      | 0.540   |
|             | 90d ED          | -0.2%  | 0.784 | -0.7%   | 0.369 | 0.5%       | 0.622   |
|             | 30d Readmission | -0.1%  | 0.729 | 0.3%    | 0.248 | -0.4%      | 0.280   |
|             | 90d Readmission | -0.2%  | 0.480 | 0.5%    | 0.086 | -0.7%      | 0.080   |
|             | 30d Mortality   | -0.1%  | 0.355 | 0.0%    | 0.927 | -0.1%      | 0.661   |
|             | 90d Mortality   | -0.4%  | 0.011 | 0.0%    | 0.929 | -0.4%      | 0.128   |
| <b>CABG</b> | Length of stay  | -0.4%  | 0.963 | -0.2%   | 0.977 | -0.1%      | 0.992   |
|             | 30d ED          | 0.1%   | 0.928 | 0.7%    | 0.562 | -0.6%      | 0.726   |
|             | 90d ED          | 0.2%   | 0.821 | 1.4%    | 0.173 | -1.2%      | 0.384   |
|             | 30d Readmission | -0.1%  | 0.712 | -0.2%   | 0.682 | 0.0%       | 0.943   |
|             | 90d Readmission | 0.2%   | 0.501 | -0.1%   | 0.733 | 0.4%       | 0.493   |
|             | 30d Mortality   | 0.05%  | 0.721 | -0.1%   | 0.432 | 0.2%       | 0.410   |
|             | 90d Mortality   | -0.01% | 0.968 | -0.1%   | 0.665 | 0.1%       | 0.782   |

CABG – Coronary Artery Bypass Grafting; ED – emergency department; PCI – Percutaneous coronary intervention; SNF – Skilled nursing facility

Supplemental Figure 1: Distribution of changes in payments, by condition and group

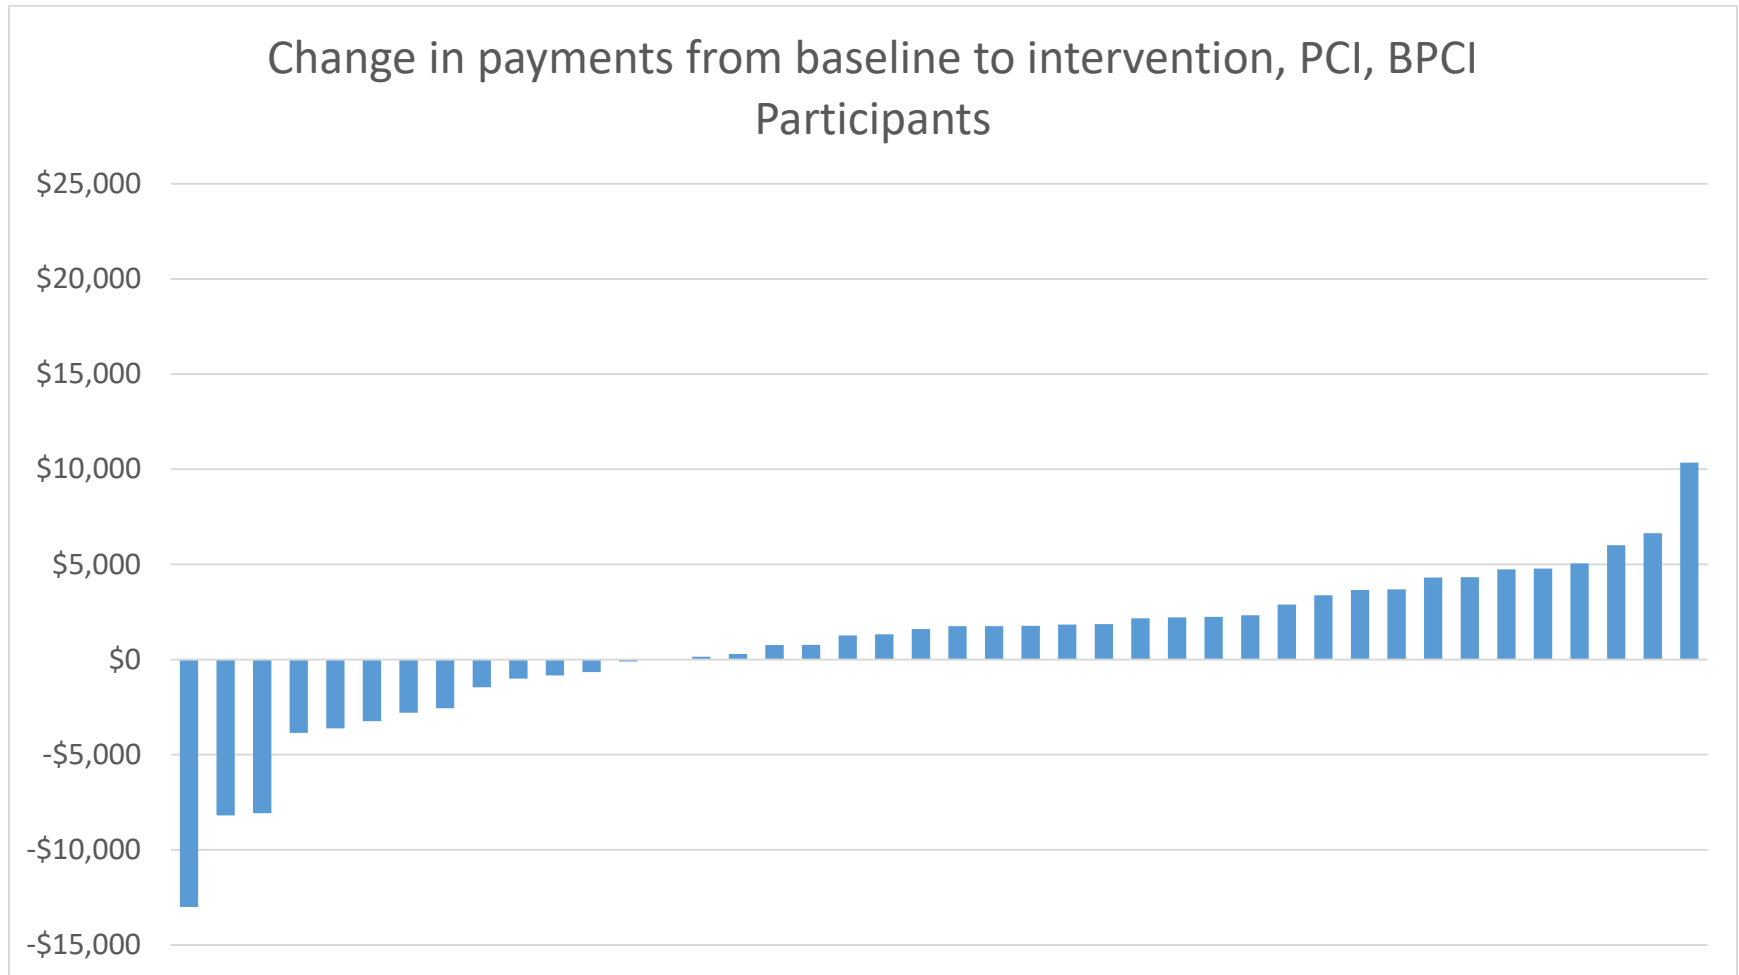

# Change in payments from baseline to intervention, PCI, Controls

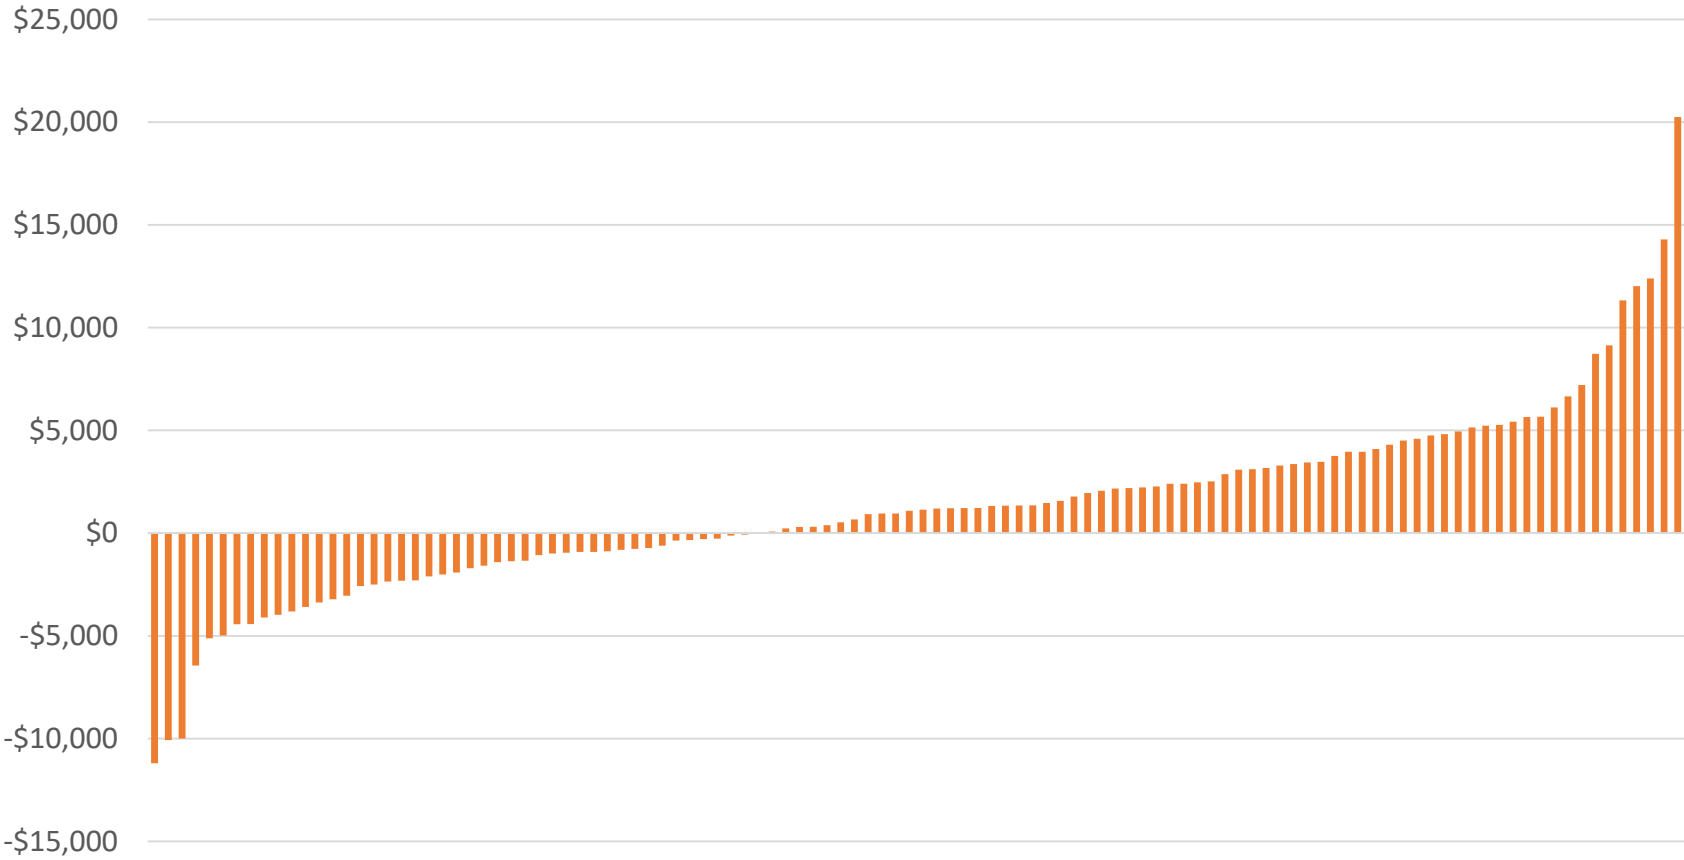

# Change in payments from baseline to intervention, CABG, BPCI Participants

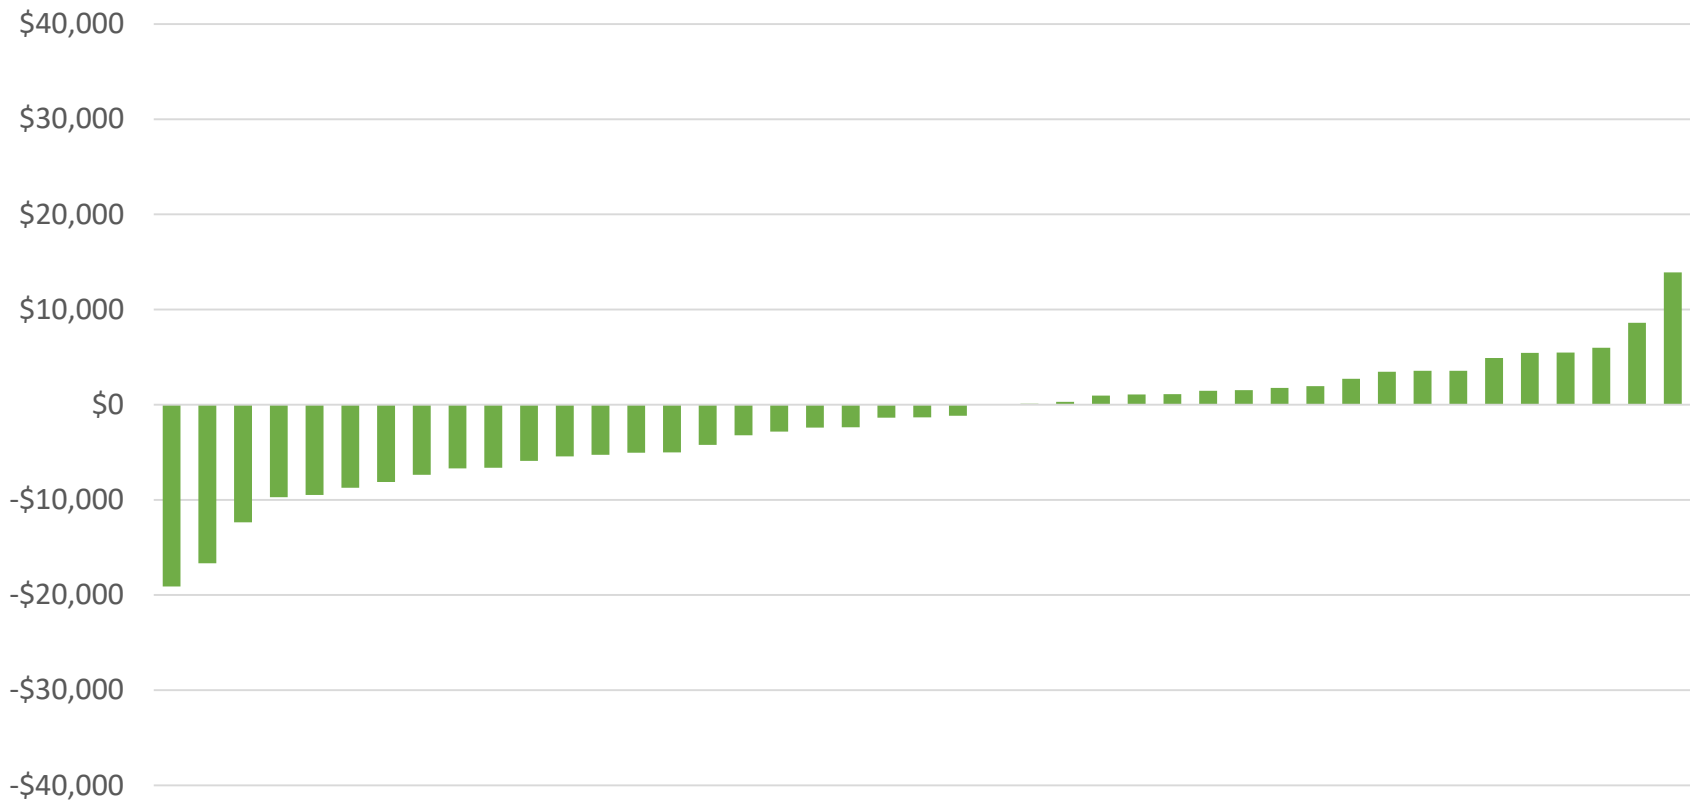

Change in payments from baseline to intervention, CABG, Controls

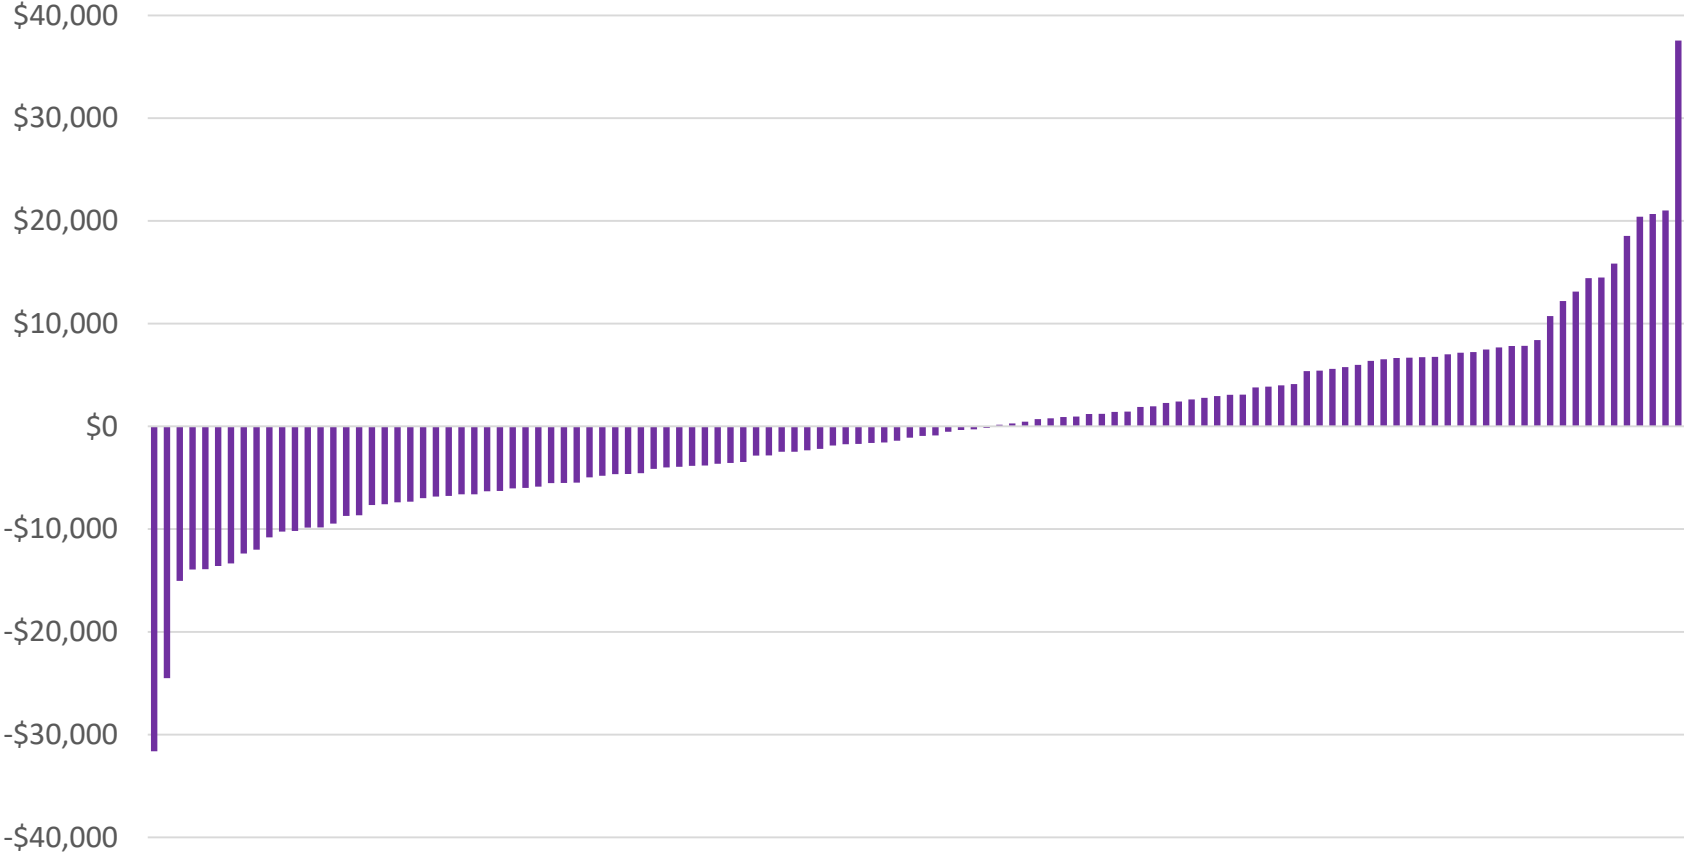



**Supplemental Table 4. Outlier vs. non-outlier cases**

| <i>PCI</i>                             | <b>BPCI</b>     |                     | <b>CONTROL</b>  |                     |
|----------------------------------------|-----------------|---------------------|-----------------|---------------------|
|                                        | <b>Baseline</b> | <b>Intervention</b> | <b>Baseline</b> | <b>Intervention</b> |
| <b>Outlier Cases</b>                   |                 |                     |                 |                     |
| <b>% of cases with outlier payment</b> | 3.9%            | 3.5%                | 3.8%            | 4.4%                |
| <b>Mean outlier payment</b>            | \$7,989         | \$9,212             | \$8,044         | \$7,807             |
| <b>Mean index payment</b>              | \$23,906        | \$26,423            | \$26,920        | \$24,787            |
|                                        |                 |                     |                 |                     |
| <b>Non-Outlier Cases</b>               |                 |                     |                 |                     |
| <b>% of cases with outlier payment</b> | 0.0%            | 0.0%                | 0.0%            | 0.0%                |
| <b>Mean outlier payment</b>            | \$0             | \$0                 | \$0             | \$0                 |
| <b>Mean index payment</b>              | \$13,390        | \$13,831            | \$13,622        | \$13,760            |
|                                        |                 |                     |                 |                     |
| <i>CABG</i>                            | <b>BPCI</b>     |                     | <b>CONTROL</b>  |                     |
|                                        | <b>Baseline</b> | <b>Intervention</b> | <b>Baseline</b> | <b>Intervention</b> |
| <b>Outlier Cases</b>                   |                 |                     |                 |                     |
| <b>% of cases with outlier payment</b> | 7.8%            | 8.7%                | 9.5%            | 10.2%               |
| <b>Mean outlier payment</b>            | \$13,288        | \$10,821            | \$9,839         | \$9,723             |
| <b>Mean index payment</b>              | \$45,138        | \$40,892            | \$44,154        | \$40,409            |
|                                        |                 |                     |                 |                     |
| <b>Non-Outlier Cases</b>               |                 |                     |                 |                     |
| <b>% of cases with outlier payment</b> | 0.0%            | 0.0%                | 0.0%            | 0.0%                |
| <b>Mean outlier payment</b>            | \$0             | \$0                 | \$0             | \$0                 |
| <b>Mean index payment</b>              | \$24,885        | \$23,884            | \$25,542        | \$25,098            |

P for difference in differences of proportion of stays with outlier payments between BPCI and matched controls = 0.299 for PCI and 0.864 for CABG.
